# Supplementary material for: Physical activity, sedentary behavior and their correlates in children with Autism Spectrum Disorder: A systematic review
Source: PLoS One. 2017 Feb 28;12(2):e0172482. doi: 10.1371/journal.pone.0172482 (PMC5330469; doi:10.1371/journal.pone.0172482)
Supplement: S2 Table — (XLSX) [file pone.0172482.s002.xlsx]

## Sheet: Included
S2 Table. Data extraction table for the physical activity papers.
author	year	country	study design cohort, x-sect, IV	participant characteristics					if cohort or IV:		PA measure						prevalence					correlates				details of assn
				age range/mean age	n	sex	ASD diagnosis	IQ	age@baseline	f/u period	PA indicator (e.g. MVPA, cpm, time outdoors)	type of measure (continuous, categorical) with details	age of msr	instrument (e.g. actigraph, survey, CARS)	minimum inclusion criteria (e.g. 2h, 3d)	psychometric values for measure	reported prevalence (as reported in paper)	reported prevalence (% of monitoring time)	reported prevalence (% meeting recommendations)	definition of a standard day	any other details	type of measure/ correlate (e.g. time outdoors, age)	instrument (e.g. EPAO)	administration (e.g. parent, teacher, obs)	pyschometric values for measure/s	association summary (+, -, 0)	type of analysis (regression, etc.)	effect size & type (e.g. r=0.23, p value, CI)
Ayvazoglu	2015	USA	x-sect	4-13y (mean 7.5±3.4y)	ASD: 6	66.6% boys	prior diagnosis	all without ID	n/a	n/a	MVPA	continuous	4-13y	ActiGraph	not reported	validity/ reliability not reported	MVPA mean mins/day: 34	not reported	not reported	not reported	n/a	n/a	n/a	n/a	n/a	n/a	n/a	n/a
Bandini	2013	USA	x-sect	range 3-11y (mean ASD 6.6±2.1y; TD 6.7±2.4y; )	ASD: 53; TD: 58	ASD: 83% boys; TD: 78% boys	parent reported diagnosis	all with ID	n/a	n/a	MVPA, total activity counts	continuous	3-11y	ActiGraph	>600 m/day on 3 weekdays and 1 weekend day	validity/ reliability not reported	accel data daily weighted avg mins (7 days): ASD children / TD chilren: MVPA: 50.0 / 57.1 accel data daily weighted avg mins (weekdays): ASD children / TD chilren: MVPA: 48.0 / 59.2 accel data daily weighted avg mins (weekend days): ASD children / TD chilren: MVPA: 53.5 / 52.1	accel data daily weighted avg (7 days): ASD children / TD children: MVPA: 6.6% / 7.5% accel data daily weighted avg (weekdays): ASD children / TD children: MVPA: 6.6% / 7.5% accel data daily weighted avg (weekend days): ASD children / TD children: MVPA: 6.6% / 7.5%	meeting 1h MVPA/day: ASD children / TD children: 23% / 43% (p<0.06)	not reported	n/a	BMI z-score	height and weight measures	researcher	not reported	0	multiple linear regression	not reported
Boddy	2015	UK	x-sect	range 5-15y (mean 9.97y; for whole sample)	33 with valid accel data: ASD: 9; non-ASD (other intellectual disability): 24	81.4% boys (for whole sample)	study confirmed diagnosis (met ADI-R cutoff)	mean (SD) IQ: 85.8 (22.1)	n/a	n/a	MVPA	continous	5-15y	ActiGraph	≥9h wear for a valid weekday; ≥8h wear for a valid weekend day; ≥3 valid days	accelerometers reported as being valid and reliable (no values given)	Mean (SE) mins/day for ASD children: MVPA: 48.3 (4.0) Mean (SE) mins/day for non-ASD children (i.e. other intellectual disability NOT TD): 50.3 (6.8) *no significant difference between groups (MANCOVA)	not reported	23% achieved ≥60min/day (of the 33 with valid accel data)	not reported	n/a	n/a	n/a	n/a	n/a	n/a	n/a	n/a
Dreyer Gillette	2015	USA	x-sect	range 10-17y	ASD: 900; TD: 45000	ASD: 84.0% boys; TD: 50.3% boys	parent reported diagnosis	not reported	n/a	n/a	participation in ≥20 mins vigorous physical activity (d/week)	categorical (0d, 1-3d, 4-6d, 7d)	10-17y	parent-report (survey)	n/a	validity/ reliability not reported	Physical activity d/week: ASD: 0d: 18.8%** 1-3d: 30% 4-6d: 31.3%* 7d: 19.9% TD: 0d: 10.2%** 1-3d: 26.8% 4-6d: 39.8%* 7d: 23.2% *Sig. higher % of TD compared to ASD (Wald Test: -2.960, p<0.01) **Sig. higher % of ASD compared to TD (Wald Test: 2.527, p<0.05)	not reported	not reported	n/a	n/a	n/a	n/a	n/a	n/a	n/a	n/a	n/a
MacDonald	2011	USA	x-sect	range 9-18y	ASD: 72	76% boys	study confirmed diagnosis (met Social Responsible Scale cutoff)	younger age group mean (SD) IQ: 82.92 (16.69); older age group mean (SD) IQ: 79.88 (20.45)	n/a	n/a	MVPA	continous	range 9-18y	Actical	≥10h/day for ≥3 weekdays and ≥1 weekend day	reported validity and reliability	mean (SD) MVPA mins/day Younger age group (9-11y): 131.57 (84.23) Older age group (12-19y): 90.02 (97.89)	not reported	meeting 60min MVPA recommendation: 100% (not reported in results - only mentioned in discussion)	not reported	n/a	IQ, autism severity, gender, age	survey	parent	psychometric measures of tools used to measure intelligence and autistic traits both reported as valid/reliable but no values given	IQ: 0 autism severity: 0 gender: 0 age: -	ANCOVA	effect size estimate (based on partial Eta squared): age: 0.07 (p<0.05)
Memari	2012	Iran	x-sect	range 7-14y; mean 9.6±1.8y	ASD: 80	69% boys	prior diagnosis (DSM-IV-TR)	all with ID	n/a	n/a	cpm	continuous	7-14y	Actigraph	≥8h/day on ≥3 weekdays and ≥1 weekend day	accelerometers reported as being valid and reliable (no values given)	mean (SD) cpm Overall PA: 7-8yo: 1763 (576) 9-10yo: 1657 (580) 11-12yo: 1265 (431) 13-14yo: 1146 (445) Weekdays PA: 7-8yo: 1763 (563) 9-10yo: 1625 (576) 11-12yo: 1253 (414) 13-14yo: 1092 (488) Weekends PA: 7-8yo: 1748 (601) 9-10yo: 1766 (730) 11-12yo: 1291 (494) 13-14yo: 1272 (381) School PA: 7-8yo: 1712 (805) 9-10yo: 1506 (635) 11-12yo: 1153 (555) 13-14yo: 874 (442) After-school PA: 7-8yo: 1802 …	not reported	not reported	not reported	n/a	sex, age, SES, day of week, psychotropic medications, sedentary pursuits, household structure, comorbidities	parent report	parent	parent survey showed moderate criterion validity and good test–retest reliability	sex (male): + age: - SES: 0 day of week (weekday): 0 psychotropic medications: 0 sedentary pursuits: - (boys only) household structure (single-parent family): - comorbidities: -	Pearson's correlations and linear multiple regression	41.9% of variance in overall PA explained by: age (t = -2.18, P = 0.03) sex (t = -2.32, P = 0.02) sedentary pursuits (t = -3.59, P < 0.001) household structure (t = -2.53, P = 0.01) comorbidities (t = -2.78, P = 0.007)
Memari	2015	Iran	x-sect	6-15y (mean 9.8±1.8y)	ASD: 83	63.9% boys	study confirmed diagnosis (met ADI-R cutoff)	all with IQ>70	n/a	n/a	Leisure time PA involvement	continous (composite score)	6-15y	Godin-Shephard Leisure Time Questionnaire (GLTEQ)	n/a	acceptable criterion validity and also reliability scores (0.74 and 0.80)	not reported	not reported	not reported	n/a	n/a	sex, age, severity of disorder, parental education, povery income ratio, family structure	survey and Autism Treatment Evaluation Checklist (ATEC) for severity of disorder	parent report	survey: good content validity and a satisfactory test-retest reliability (intraclass correlation = 0.69, p<0.001) ATEC: reported as valid	sex (boys): + age: - severity of disorder: 0 parental education: 0 poverty income ratio: + family structure (single parent family): -	t-tests and correlation analysis	sex (boys): t=4.31, p<0.001 age: r=-0.298, p=0.003 poverty income ratio: r=0.31, p=0.005 family structure (single parent family): t=3.91, p<0.001
Must	2015	USA	x-sect	3-11y (mean ASD: 6.6±2.1y; TD: 6.7±2.4y)	ASD: 53; TD: 58	ASD: 83% boys; TD: 78% boys	study confirmed diagnosis (met ADI-R cutoff)	not reported	n/a	n/a	participation in organised and unstructured PA (used to estimate total number of activities and total hours of PA each year)	continuous	3-11y	parent-report (survey)	n/a	reported as being reliable (validity not reported)	not reported	not reported	not reported	n/a	n/a	Barriers to physical activity (i.e. child [e.g. poor motor skills], social [e.g. few friends] and community [e.g. cost] barriers	questionnaire	parent report	not reported	Assn b/w barriers and: PA hours/year: - Total activities/year: 0	pearson correlation	PA hours/year: r=-0.27, p=0.05
Obrusnikova	2011	USA	x-sect	range 8-14y (mean 10.6±1.7y)	ASD: 14	86% boys	prior diagnosis: n=10 asperger syndrome; n=3 PDD-NOS; n=1 autism	not reported	n/a	n/a	MVPA	continuous	8-14y	Actical	≥10h/day	validity/ reliability not reported	mean (SD) mins/day MVPA: 81.7 (62.0)	6% (SD 4.6)	21% met 60min MVPA recommendation on all days	not reported	n/a	n/a	n/a	n/a	n/a	n/a	n/a	n/a
Orsmond	2011	USA	cohort (reports time 3 and 4)	range 12-21y; (mean 17.8±2.2y)	ASD: 103	76% boys	study confirmed diagnosis (met ADI-R cutoff)	56% with ID	not reported (17.8y at time 3)	18mo	physical activity	continuous, then dichotomised into participates in PA yes/no	12-21y	parent report (time use diary)	n/a	time use diary shown to be valid and reliable	mean (range) mins/day : 0.56 (0-4.79)	not reported	not reported	n/a	n/a	day of week, age, sex, family size, maternal education, maternal marital status	parent report	parent		day of week: 0 age: 0 sex: 0 family size: 0 maternal education: + maternal marital status: 0	chi square	maternal education: x2(1) = 5.02, p = .040; d = 0.45
Pan	2005	USA	x-sect	mean 13.2y	ASD: 30	90% boys	parent reported diagnosis: n=14 autism; n=12 asperger’s syndrome, n=4 PDD-NOS	all without ID	n/a	n/a	MVPA and cpm	continuous	13.2y	Actigraph	≥8h/day on ≥3 weekdays and ≥1 weekend day	accelerometers reported as being valid and reliable (no values given)	mean min/day MVPA: 78.2 mean cpm: 490.4	not reported	47% met 60min MVPA recommendation	not reported	n/a	age, sedentary pursuits, maternal/paternal MVPA, maternal/paternal cpm, maternal/paternal support for PA	parent report and parent accel data	parent		correlations with cpm: age: - sedentary pursuits: - maternal cpm: - paternal cpm: 0 maternal support for PA: 0 paternal support for PA: 0 correlations with MVPA: age: - sedentary pursuits: 0 maternal MVPA: 0 paternal MVPA: 0 maternal support for PA: 0 paternal support for PA: 0	Pearson product-moment correlation	correlations with cpm: age: r = -0.59, p<0.01 sedentary pursuits: r = -0.47, p<0.05 maternal cpm: r = -0.00, p<0.05 correlations with MVPA: age: r = -0.69, p<0.01
Pan	2006	USA	x-sect	range 10-19y (mean 13.2±2.1y); stratified to elementary school (10.67±5.0y), middle school (13.33±1.0y); high school (15.09±1.38y)	ASD: 30	90% boys	parent reported diagnosis: n=14 autism; n=12 asperger’s syndrome, n=4 PDD-NOS	all without ID	n/a	n/a	MVPA and cpm	continuous	10-19y	Actigraph	≥8h/day on ≥3 weekdays and ≥1 weekend day	accelerometers reported as being valid and reliable (no values given)	cpm: elementary: 670.48 ± 374.25 middle: 482.54 ± 128.09 high: 361.22 ± 119.70 MVPA min/day: elementary: 132.58 ± 79.36 middle: 75.18 ± 32.72 high: 39.67 ± 18.69	not reported	total group: 47% met 60min MVPA recommendation elementary: 78% middle: 67% high: 0.08%	not reported	n/a	day of week, school level (i.e. elementary, middle or high)	n/a	n/a	n/a	day of week: 0 school level: -	ANOVA	school level: cpm: F=4.72, p=0.02 MVPA: F=9.57, p=0.00
Pan	2011	Taiwan	x-sect	range 7-12y (mean lower grade: 7.56±0.76, middle grade: 9.57±0.50, upper grade: 11.82±0.36)	ASD: 35 (13 lower grade, 13 middle grade, 9 upper grade)	100% boys	prior diagnosis (DSM-IV-TR): n=14 asperger’s syndrome; n=22 mild autistic disorder	not reported	n/a	n/a	MVPA	continuous	7-12y	Actigraph	4 weekdays and 1 weekend day	accelerometers reported as being valid (no values given)	MVPA weekday mean (SD) mins/day: lower grade:128.99 (19.63) middle grade:92.19 (18.30) upper grade:90.93 (15.75) MVPA weekend day mean (SD) mins/day: lower grade: 135.09 (49.90) middle grad: 105.66 (39.39) upper grade: 57.05 (26.29)	weekday MVPA % (SD) of monitored length: lower grade:15.91 (2.44) middle grade:11.12 (2.07) upper grade: 11.15 (2.11) weekend MVPA % (SD) of monitored length: lower grade: 18.56 (6.70) middle grade:14.24 (4.89) upper grade: 7.61 (3.03)	not reported	not reported	n/a	grade level, day of week	n/a	n/a	n/a	grade level: - day of week: 0	two-way ANOVA	grade level: MVPA: F=15.95 (p=0.00) day of week: MVPA: F=0.82 (p=0.38)
Sandt	2005	USA	x-sect	range 5-12y (mean ASD children 9.5±1.9y; TD children 8.9±2.0y)	ASD: 15; TD: 13	ASD: 67% boys; TD 32% boys	n=9 autism; n=2 asperger's syndrome; n=4 PDD-NOS (no report on who performed diagnosis)	not reported	n/a	n/a	MVPA	continuous	5-12y	Actigraph	4 weekdays and 1 weekend day	accelerometers reported as being valid and reliable (no values given)	MVPA mean (SD) mins/day: ASD children / TD children all day: 127.5 (72.3) / 132.1 (45.6) PE: 12.8 (6.8) / 16.7 (4.8) recess: 15.5 (8.8) / 22.6 (7.8) after school: 51.9 (35.7) / 66.2 (22.8) (no significant differences)	not reported	meeting 60min MVPA recommendation every day: ASD children: 67% TD children: 92% (p value not reported)	not reported	n/a	n/a	n/a	n/a	n/a	n/a	n/a	n/a
Tatsumi	2015	Japan	x-sect	mean age: ASD: 60 months; control: 66 months	ASD: 31; control: 16	ASD: 80.6% boys; control: 62.5% boys	prior diagnosis (DSM-IV)	not reported	n/a	n/a	CPM	continous	range: 48-83 months	Actiwatch	not reported	reported as being valid	Median (range) CPM: Control children: Weekday morning (9am-12pm): 803.1 (624.5–962.5) Weekday afternoon (12pm-6pm): 740.0 (395.6–878.6) Weekday evening (6pm-sleep): 755.5 (487.2–638.0) Weekend day morning: 746.0* (708.3–930.0) Weekend day afternoon: 789.7 (670.0–994.0) Weekend day evening: 577.5 (447.7–738.3) ASD children: Weekday morning: 758.3 (687.0–936.8) Weekday afternoon: 649.3 (510.5–694.3…	not reported	not reported	not reported	n/a	n/a	n/a	n/a	n	n/a	n/a	n/a
Tyler	2014	USA	x-sect	mean age: ASD: 12.6±2.3y TD: 9.0±1.8y	ASD: 17 TD: 12	ASD: 53% boys TD: 50% boys	study confirmed diagnosis (met ADOS cutoff)	verbal IQ mean (SD): 60.1 (25), range 16-110; nonverbal IQ mean (SD): 65.7 (40), range 16-172	n/a	n/a	MVPA	continuous	range 9-17y	ActiGraph GT3X accel	not reported	reported validity and reliability (from previous studies - no values given)	mean (SD) MVPA mins/day: ASD: 165.9 (58.7) TD: 218.3 (65.6)	not reported	not reported	not reported	n/a	n/a	n/a	n/a	n/a	n/a	n/a	n/a
Wachnob	2015	USA	x-sect	range: 9-16y (mean 11.8±2.3y)	ASD: 10	90% boys	parent reported diagnosis	not reported	n/a	n/a	MVPA	continuous	9-16y	ActiGraph	≥8h/day	validity/ reliability not reported	Weekday mean (SD) mins/day: 76.32 (91.70) Weekend day mean (SD) mins/day: 63.27 (63.48) *NB means calculated from individual participants time in MVPA	not reported	not reported	not reported	n/a	sleep quality (sleep efficiency and wake after sleep onset [WASO])	Actigraph and parent-reported sleep logs	parent report	not reported	sleep efficiency: 0 WASO: -	Spearman-Rank correlations	WASO: r=-0.917, p=0.001
