# Supplementary material for: Physical activity, sedentary behavior and their correlates in children with Autism Spectrum Disorder: A systematic review
Source: PLoS One. 2017 Feb 28;12(2):e0172482. doi: 10.1371/journal.pone.0172482 (PMC5330469; doi:10.1371/journal.pone.0172482)
Supplement: S3 Table — (XLSX) [file pone.0172482.s003.xlsx]

## Sheet: Included
S3 Table. Data extraction table for the sedentary behavior papers.
author	year	country	study design cohort, x-sect, IV	participant characteristics					if cohort or IV:		SB measure						prevalence					correlates				details of assn
				age range/mean age	n	sex	ASD diagnosis	IQ	age@baseline	f/u period	SB indicator (e.g. cpm, TV)	type of measure (continuous, categorical) with details	age of msr	instrument (e.g. actigraph, survey, CARS)	minimum inclusion criteria (e.g. 2h, 3d)	psychometric values for measure	reported prevalence (as reported in paper)	reported prevalence (% of monitoring time)	reported prevalence (% meeting recommendations)	definition of a standard day	any other details	type of measure/ correlate (e.g. time outdoors, age)	instrument (e.g. EPAO)	administration (e.g. parent, teacher, obs)	pyschometric values for measure/s	association summary (+, -, 0)	type of analysis (regression, etc.)	effect size & type (e.g. r=0.23, p value, CI)
Boddy	2015	UK	x-sect	range 5-15y (mean 9.97y); for whole sample)	33 with valid accel data: ASD: 9; non-ASD (other intellectual disability): 24	81.4% boys (for whole sample)	parent reported diagnosis	all with ID	n/a	n/a	sed time mins/day	continous	5-15y	ActiGraph	≥9h wear for a valid weekday; ≥8h wear for a valid weekend day; ≥3 valid days	accelerometers reported as being valid and reliable (no values given)	Mean (SE) sed mins/day for ASD children: 428.2 (12.3) Mean (SE) mins/day for non-ASD children (i.e. other intellectual disability NOT TD): 413.5 (20.8) *no significant difference between groups (MANCOVA)	not reported	n/a	not reported	n/a	Group size during playtime at recess (i.e. playing alone, in small group, medium group, or large group)	System for Observing Children's Activity and Relationships during Play (SOCARP)	observation	inter-observer reliability (0.8)	Playing alone: - Small group: + Medium group: 0 Large group: 0	partial correlations	Playing alone: r=-0.45, p=0.02 Small group: r=0.54, p<0.01
Chonchaiya	2011	Thailand	x-sect	mean ASD: 2.56±0.66y; DLD: 2.11±0.47y; TD: 2.43±0.81y	ASD: 65; DLD: 56; TD: 84	ASD: 77.8% boys; DLD: 82.1% boys; TD: 65.5% boys	study confirmed diagnosis (DSM-IV-TR)	not reported	n/a	n/a	TV viewing	continuous	range: 1-4y	parent survey (not completely clear though)	n/a	validity/ reliability not reported	ASD: 4.60 ± 1.91 h/day DLD: 3.05 ± 1.90 h/day TD: 2.06 ± 1.21 h/day	n/a	Watching ≥2h/day: ASD: 94.4% DLD: 69.6% TD: 56%	n/a	n/a	n/a	n/a	n/a	n/a	n/a	n/a	n/a
Dreyer Gillette	2015	USA	x-sect	range 10-17y	ASD: 900; TD: 45000	ASD: 84.0% boys; TD: 50.3% boys	parent reported diagnosis	not reported	n/a	n/a	screen time (TV/ video/ video games and computer/ cell phone/ electronics) mins/day	categorical	10-17y	parent report (survey)	n/a	validity/ reliability not reported	ASD children: TV/ video/ video games: <1h/day: 41.4% 1-4h/day: 42.2% ≥4h/day 16.4% Computer/ cell phone/ electronics: Never: 19.8%* <1h/day: 42.7% 1-4h/day: 25.5% ≥4h/day 12.0% Non-ASD children: TV/ video/ video games: <1h/day: 40.5% 1-4h/day: 44.6% ≥4h/day 14.9% Computer/ cell phone/ electronics: Never: 8.7%* <1h/day: 46.8% 1-4h/day: 28.9% ≥4h/day 15.6% * significant difference between ASD and n…	n/a	not reported	n/a	n/a	n/a	n/a	n/a	n/a	n/a	n/a	n/a
Engelhardt	2013	USA	x-sect	mean ASD: 11.8±2.7y; ADHD: 11.3±2.5y; TD: 12.2±2.4y	ASD: 49; ADHD: 38; TD: 41	100% boys	prior diagnosis (DSM-IV-TR): autistic disorder: 42%; asperger's disorder: 27%; PDD-NOS: 31%	3 with IQ≤70; remainder IQ>70	n/a	n/a	Media use (TV, computer, video games)	continuous	range: 8-17y	parent survey	n/a	validity/ reliability not reported	mean (SD) TV h/day: ASD: 2.3 (1.3) ADHD: 1.8 (0.9) TD: 1.7 (0.9) mean (SD) video game h/day: ASD: 2.1 (1.3) ADHD: 1.8 (1.1) TD: 1.2 (0.9)	n/a	not reported	n/a	n/a	age, number of siblings, average sleep, ASD symptoms, ADHD symptoms	ASD symptoms: Social Communication Questionnaire (SCQ) ADHD symptoms: Vanderbilt Attention-Deficit/ Hyperactivity Disorder Parent Rating Scale	parent report	SCQ: Cronbach’s alpha ranged from 0.62 to 0.81 across groups Vanderbilt Scale: Cronbach’s alpha ranged from 0.87 to 0.93 across groups	correlates of TV: age: 0 number of siblings: 0 average sleep: 0 ASD symptoms: + ADHD symptoms: 0 correlates of video games: age: + number of siblings: 0 average sleep: - ASD symptoms: 0 ADHD symptoms: 0	correlation	correlates of TV: ASD symptoms: 0.40 (p<0.05) correlates of video games: age: 0.30 (p<0.05) average sleep: -0.50 (p<0.05)
Foran	2012	USA	x-sect	mean 10.3±4.3y	ASD: 174; ASD and other physical and/or intellectual disability: 41	85.6% boys	parent reported diagnosis	non-ID sample	n/a	n/a	videogame use	continuous	range: 3-22y	parent survey	n/a	validity/ reliability not reported	ASD only: 1.44 ± 1.22h/day ASD + other disability: 0.90 ± 1.01h/day	n/a	not reported	n/a	n/a	sex, age	survey	parent	not reported	sex (boys): + age: +	chi-square or Fisher's exact test	sex: not reported age: r=0.23 (p<0.001)
Kuo	2014	Canada	x-sect	mean 14.8±1.9y	ASD: 91	81% boys	parent reported diagnosis: asperger's syndrome: 58%; autistic disorder: 19%; PDD-NOS: 18%	7% with ID	n/a	n/a	Media use (TV, computer use)	continuous	range 12-18y	survey (self-report)	n/a	validity/ reliability not reported	TV: 2.25 ± 1.94h/day Computer use: 4.91 ± 3.91h/day	n/a	not reported	n/a	n/a	age, sex, comorbidity of intellectual disability, parental education, parental employment, autism symptoms, family income	survey	parent	autism symptoms: good reliability and convergent validity of tool reported. Psychometric properties of other correlates not reported	TV viewing: no assns with any correlate Video games: age: 0 sex (male): + comorbidity of intellectual disability: 0 parental education: 0 parental employment: 0 autism symptoms: 0 family income: +	chi-square and t-tests	Video games: sex (male): χ2 (1) = 4.49, p = .034 family income: t(89) = −2.05, p = .043
Kuo	2015	Canada	cohort (but only x-sect results reported)	mean ASD: 15.1±2.3y; siblings: 14.4±2.2y	ASD: 29; siblings: 16	ASD: 90% boys; siblings: 50% boys	prior diagnosis (DSM-IV-TR)	not reported	ASD: 15.1y; siblings: 14.4y	1y	screen time (TV and video games)	continuous	~15y	parent report (survey)	n/a	not reported	Mean h/day (SD) ASD: TV: 2.9 (2.7) Videogames: 2.4 (2.5) Siblings: TV: 3.8 (2.4) Videogames: 1.5 (2.6) No sig differences bw ASD and siblings	n/a	not reported	n/a	n/a	Parental mediation of screen time (restrictive, active and social mediation)	Television mediation measure and video game mediation measure	parents	Alpha reliabilities for all measures >0.80	TV viewing: Restrictive mediation: 0 Social mediation: + Active mediation: + Videogaming: Restrictive mediation: 0 Social mediation: 0 Active mediation: 0	bivariate correlations	TV viewing: Social mediation: r=0.45, p<0.05 Active mediation: r=0.50, p<0.01
MacDonald	2011	USA	x-sect	range 9-18y	ASD: 72	76% boys	study confirmed diagnosis (met Social Responsible Scale cutoff)	younger age group mean (SD) IQ: 82.92 (16.69); older age group mean (SD) IQ: 79.88 (20.45)	n/a	n/a	sed time mins/day	continuous	range 9-18y	Actical accel	≥10h/day for ≥3 weekdays and ≥1 weekend day	reported validity and reliability	Mean (SD) mins/day sedentary: Younger age group (9-11y): 666.67 (107.17) Older age group (12-19y): 789.16 (113.51)	not reported	not reported	not reported	n/a	IQ, autism severity, gender, age	survey	parent	psychometric measures of tools used to measure intelligence and autistic traits both reported as valid/reliable but no values given	IQ: 0 autism severity: 0 gender: 0 age: +	ANCOVA	effect size estimate (based on partial Eta squared): age: 0.36 (p≤0.001)
MacMullin	2015	Canada	x-sect	range 6-21y (mean ASD: 11.72±3.61y; TD: 12.25±3.97y	ASD: 139; TD: 172	ASD: 83.9% boys; TD: 77.9% boys	parent reported diagnosis (DSMIV- TR): autistic disorder: 52%; asperger’s syndrome: 63%; PDD-NOS: 11%	not reported	n/a	n/a	electronic device use	continuous	6-21y	parent report (survey)	n/a	not reported	Total device use mean (SD) h/day ASD: Male: 3.35 (1.04) Female: 3.18 (1.06) TD: Male: 3.11 (1.00) Female: 3.07 (0.79) No sig difference bw ASD and TD	n/a	not reported	n/a	n/a	sex	n/a	n/a	n/a	sex: 0	ANOVA	ns
Mazurek	2013 (J Autism Dev Disord)	USA	x-sect	mean ASD: 12.1±2.8y TD siblings: 12.5±2.6y	ASD: 202; TD siblings: 179	ASD: 84% boys; TD siblings: 49% boys	parent reported diagnosis: autistic disorder: 53.5%; asperger’s disorder: 27.2%, PDD-NOS: 17.3%	9.4% with IQ ≤70, 6.6% with IQ>70, 45% unknown	n/a	n/a	screen-based media (TV, video/ computer games, social media use)	continuous	range 8-18y	parent survey	n/a	validity/ reliability not reported	Mean (SD) h/day for ASD boys: TV: 2.2 (1.5) video games: 2.4 (1.7) social media use: 0.2 (0.6) Mean (SD) h/day for TD boys: TV: 1.9 (1.1) video games: 1.6 (1.1) social media use: 0.8 (1.1) Mean (SD) h/day for ASD girls: TV: 2.4 (1.7) video games: 1.8 (1.3) social media use: 0.3 (0.7) Mean (SD) h/day for TD girls: TV: 1.9 (1.0) video games: 0.8 (0.9) social media use: 1.2 (1.2)	n/a	not reported	n/a	n/a	IQ, race, parent marital status, household income	survey	parent	not reported	IQ: 0 race: 0 parent marital status: 0 household income: 0	one-way ANOVA	not reported
Mazurek	2013 (Pediatrics)	USA	x-sect	mean ASD: 11.7±2.6y; ADHD: 11.1±2.4y; TD: 12.2±2.4y	ASD: 56; ADHD: 44; TD: 41	100% boys	prior diagnosis: autistic disorder: 46%; asperger’s disorder: 25%; PDD-NOS: 29%	n=4 with IQ ≤70	n/a	n/a	videogame use	continuous	range 8-18y	parent survey	n/a	validity/ reliability not reported	videogame mean (SD) h/day: ASD: 2.1 (1.3) ADHD: 1.7 (1.1) TD: 1.2 (0.9)	n/a	n/a	n/a	n/a	n/a	n/a	n/a	n/a	n/a	n/a	n/a
Mazurek	2013 (Res Autis Spect Disord)	USA	x-sect	12.1±2.8y	ASD: 169	100% boys	parent reported diagnosis: autistic disorder: 53%; asperger’s disorder: 28%; PDD-NOS: 19%	9% with IQ ≤70	n/a	n/a	video or computer game use	continuous	range 8-18y	parent survey	n/a	validity/ reliability not reported	videogame mean (SD) h/day: 2.4 (1.7)	n/a	n/a	n/a	n/a	age, problematic video game use (i.e. addiction) inattention, hyperactivity, oppositional defiant	Problem Video Game Playing Test (PVGT); Vanderbilt Attention Deficity/ Hyperactivity Disorder Parent Rating Scale (VADPRS)	parent report	Cronbach’s alpha coefficients (in current sample): PVGT: 0.94 VADPRS: inattention subscale: 0.88 hyperactivity/impulsivity subscale: 0.87 oppositional defiant subscale: 0.88	age: + problem video game use: + inattention: 0 hyperactivity: 0 oppositional defiant: 0	Pearson's correlations	age: r = .23, p = .003 problem video game use: r = .314, p < .001
Must	2014	USA	x-sect	mean ASD: 6.6±2.1y; TD: 6.7±2.4y	ASD: 53; TD: 58	ASD: 83% boys; TD: 78% boys	study confirmed diagnosis (met ADI-R cutoff)	mean (SD) IQ: 85.8 (22.1)	n/a	n/a	screen time (TV, computer, video games); and total sedentary behaviour time (screen time, car time, crafts/board games, reading)	continuous	range 3-11y	parent survey	n/a	test re-test reliability for total sedentary behaviour time: weekday: Spearman’s r = 0.87 for ASD, r = 0.72 for TD; weekend: r = 0.58 for ASD, r = 0.70 for TD	weekday mean (SD) h/day: ASD children: total screen time: 2.5 (0.22) total sedentary behaviour: 5.2 (0.34) TD children: total screen time: 1.6 (0.21) total sedentary behaviour: 4.2 (0.32) weekend day mean (SD) h/day: ASD children: total screen time: 3.9 (0.32) total sedentary behaviour: 7.3 (0.44) TD children: total screen time: 3.1 (0.31) total sedentary behaviour: 6.9 (0.41)	n/a	n/a	n/a	n/a	BMI z-score, PA	BMI: height and weight measures PA: survey	BMI: researcher PA: parent report	not reported	BMI: weekday screen time: 0 weekday SB: 0 weekend screen time: + weekend SB: + PA: weekday screen time: - weekday SB: - weekend screen time: 0 weekend SB: 0 (no assns for TD children for either BMI or PA)	Pearson and Spearman correlations and multiple linear regression	BMI: weekend screen time: β (SE) = 0.18 (0.06), p = 0.009 weekend SB: β (SE) = 0.13 (0.05), p = 0.008 PA: weekday screen time: r = −0.39, p = 0.006 weekday SB: r = −0.29, p = 0.04
Must	2015		x-sect	range 3-11y (mean ASD: 6.6±2.1y; TD: 6.7±2.4y)	ASD: 53; TD: 58	ASD: 83% boys; TD: 78% boys	study confirmed diagnosis (met ADI-R cutoff)	mean (SD) IQ: 85.8 (22.1)	n/a	n/a	screen time	continuous	3-11y	parent report (survey)	n/a	reported as being reliable (validity not reported)	not reported	not reported	not reported	n/a	n/a	Barriers to physical activity (i.e. child [e.g. poor motor skills], social [e.g. few friends] and community [e.g. cost] barriers	questionnaire	parent report	not reported	assn b/w barriers and: weekly total screen time: + weekday screen time: + weekend day screen time: 0	pearson correlation	weekly total screen time: r=0.32, p=0.03 weekday screen time: r=0.32, p=0.03
Orsmond	2011	USA	cohort (reports time 3 and 4)	range 12-21y; (mean 17.8±2.2y)	ASD: 103	76% male			not reported (17.8y at time 3)	18mo	TV, computer use	continuous	range: 12-21y	parent report (time use diary)	n/a	time use diary shown to be valid and reliable	TV mean (SD) h/day: 2.27 (2.19) computer mean (SD) h/day: 1.65 (1.64)	n/a	not reported	n/a	n/a	age, gender, intellectual disability, maladaptive behaviours, verbal communication impairment, family size, maternal education, maternal employment, marital status	demographics: survey ASD symptoms/ behaviours: Autism Diagnostic Invterview - Revised (ADI-R) and Scales of Independent Behavior - Revised (SIB-R)	parent	ADI-R: inter-rater reliability: 88% SIB-R: good reliability and validity have been documented by the test authors	age: 0 gender: 0 intellectual disability: - (computer use) maladaptive behaviours: 0 verbal communication impairment: - (TV and computer use) family size: - (TV) maternal education: 0 maternal employment: 0 marital status (married): + (computer)	chi-square and t tests	computer use: intellectual disability: x2(1) = 5.40, p = .020; d = 0.47 verbal communication impairment: t(87) = 2.29, p = .025; d = 0.49 marital status (married): + (computer) TV: verbal communication impairment: t(97) = 2.04, p = .044; d = 0.41 family size: -TV t(101) = 2.33, p = .022; d = 0.46
Shane	2008	USA	x-sect	not reported (only reported as <18y)	ASD: 89	86% boys	not reported	parents asked not to report	n/a	n/a	screen time (TV, video/DVD, computer game, educational software)	categorical (0-1h/day, 1-3h/day, 3+h/day)	not reported	parent survey	n/a	validity/ reliability not reported	TV: 0-1h/day: 52% 1-3h/day: 27% 3+h/day: 23% video/DVD: 0-1h/day: 36% 1-3h/day: 39% 3+h/day: 24% computer games: 0-1h/day: 64% 1-3h/day: 31% 3+h/day: 3% educational software: 0-1h/day: 76% 1-3h/day: 21% 3+h/day: 2%	n/a	not reported	n/a	n/a	n/a	n/a	n/a	n	n/a	n/a	n
Soden	2012	USA	x-sect	mean 13.3±2.8y	ASD: 26	80.8% boys	prior diagnosis (DSM-IV-TR): n=9 autistic disorder; n=6 asperger's disorder; n=11 PDD-NOS	not reported	n/a	n/a	electronic media (TV, computer, video)	continuous	range 10-18y	parent survey	n/a	validity/ reliability not reported	mean (SD) mins/day Total electronic media use: 251.0 (233.8) TV: 107.0 (95.3) Computer: 83.0 (107.7) Video: 61.0 (57.7)	n/a	not reported	n/a	n/a	n/a	n/a	n/a	n/a	n/a	n/a	n/a
Tyler	2014	USA	x-sect	mean ASD: 12.6±2.3y; TD: 9.0±1.8y	ASD: 17; TD: 12	ASD: 53% boys; TD: 50% boys	study confirmed diagnosis (met ADOS cutoff)	verbal IQ mean (SD): 60.1 (25), range 16-110; nonverbal IQ mean (SD): 65.7 (40), range 16-172	n/a	n/a	sed time mins/day	continuous	range 9-17y	ActiGraph GT3X accel	not reported	reported validity and reliability (from previous studies - no values given)	Mean (SD) mins/day sedentary: ASD: 452.1 (100.5) TD: 369.14 (105.7)	not reported	n/a	not reported	n/a	n/a	n/a	n/a	n/a	n/a	n/a	n/a
