# Supplementary material for: Physical activity, sedentary behavior and their correlates in children with Autism Spectrum Disorder: A systematic review
Source: PLoS One. 2017 Feb 28;12(2):e0172482. doi: 10.1371/journal.pone.0172482 (PMC5330469; doi:10.1371/journal.pone.0172482)
Supplement: S5 Table — a 1 = strong quality/low risk of bias, 2 = moderate quality/risk of bias, 3 = weak quality/high risk of bias. (DOCX) [file pone.0172482.s005.docx]

S5 Table. Risk of biasa for papers reporting sedentary behavior outcomes

| **Paper** | **Selection Bias** | **Study Design** | **Confounders** | **Data collection methods** | **Withdrawal and dropouts** | **Analyses** | **Global score** |
| --- | --- | --- | --- | --- | --- | --- | --- |
| Boddy et al. 201539 | 2 | 3 | 1 | 1 | 3 | 1 | 3 |
| Chonchalya et al. 201142 | 2 | 3 | 2 | 3 | 1 | 1 | 3 |
| Dreyer Gillette et al. 201535 | 1 | 3 | 1 | 3 | 3 | 1 | 3 |
| Engelhardt et al. 201343 | 2 | 3 | 1 | 3 | 3 | 1 | 3 |
| Foran et al. 201244 | 3 | 3 | 3 | 3 | 1 | 1 | 3 |
| Kuo et al. 201453 | 2 | 3 | 3 | 3 | 1 | 1 | 3 |
| Kuo et al. 201552 | 2 | 2 | 1 | 3 | 1 | 1 | 2 |
| MacDonald et al. 201133 | 3 | 3 | 3 | 3 | 1 | 1 | 3 |
| MacMullin et al. 201551 | 2 | 3 | 3 | 3 | 1 | 1 | 3 |
| Mazurek et al. 201347 | 2 | 3 | 3 | 3 | 1 | 1 | 3 |
| Mazurek et al. 201345 | 2 | 3 | 1 | 3 | 3 | 1 | 3 |
| Mazurek et al. 201346 | 2 | 3 | 3 | 3 | 1 | 1 | 3 |
| Must et al. 201448 | 2 | 3 | 1 | 2 | 3 | 1 | 3 |
| Must et al. 201540 | 2 | 3 | 1 | 3 | 3 | 1 | 3 |
| Orsmond et al. 201128 | 3 | 2 | 3 | 1 | 2 | 1 | 3 |
| Shane et al. 200849 | 3 | 3 | 3 | 3 | 3 | 1 | 3 |
| Soden et al. 201250 | 2 | 3 | 3 | 3 | 1 | 1 | 3 |
| Tyler et al. 201434 | 2 | 3 | 3 | 1 | 3 | 1 | 3 |

a 1= strong quality/low risk of bias, 2 = moderate quality/risk of bias, 3= weak quality/high risk of bias
